# Supplementary material
Source: MDPI journal article supplement (https://www.mdpi.com/2075-4426/11/1/11)
Supplement: s1 [file s1]

6 December 2018

Dr Corey Nislow  
University Of British Columbia Sequencing And Bioinformatics Consortium  
Pharmaceutical Sciences Building Room 3124  
Vancouver, BRITISH COLUMBIA, V6T 1Z3

Dear Dr Nislow,

Please find attached your patient's myDNA report.

**Patient Full Name:** Patient S81-252  
**Patient Address:** 6619-2405 Wesbrook Mall, Vancouver, BC, V6T 1Z3  
**DOB:** 1-Mar-1965  
**Reference ID:** 81995N4T3V1  
**Patient Phone Number:** +16048271579

This myDNA medication pharmacogenomic test was ordered by your patient and they nominated you to receive a copy of their results.

The myDNA medication test is a pharmacogenomic test which looks at common genetic variants in a number of genes with likely clinical significance and potential to enhance safe and effective prescribing of a range of medications. The information provided by the test is mainly around drug metabolism and how genotype-predicted changes influence plasma concentrations, and clinical effects (both therapeutic and adverse). The reports prepared by the myDNA clinical team, provide suggestions on medication selection, dose modification and other clinically relevant information. This information is based on the published literature, as well as peer-reviewed pharmacogenomic guidelines where available.

**This report is not sent directly to the patient.** The results and report are delivered to the patient by a registered healthcare professional, who is either 1) a requesting doctor, 2) a requesting community pharmacist or 3) the patient's self-nominated doctor if the test was conducted with a self-administered kit. Following the delivery of the results by the relevant healthcare professional, the patient is given access to a secure online portal at [www.mydna.life/explore](http://www.mydna.life/explore) where they can view their report and receive simple explanations of the results.

As pharmacogenomics is a relatively new area of medicine which clinicians are incorporating into their practice, our service believes it is vital to provide timely support. Therefore, we have a clinical team available by phone to answer any questions you may have about this report, including interpretation and clinical utility, or about pharmacogenomics in general. The clinical team can be reached on 1-844-472-7896.

Kind Regards,

A/Prof Les Sheffield  
Medical Director  
MyDNA Life

# ABOUT THIS REPORT

---

## Overview

This report provides clinically relevant information on what the patient's genetic results predict about their response to a number of medications covered by this report.

The information concerns drug metabolism and plasma concentrations (drug exposure), as well as the potential for altered clinical effects.

Based on the available information found in the published literature, each medication has been assigned a category according to the likely clinical significance of each gene-drug interaction.

The three categories are:

-  Major – significant result that may require altering this medication
-  Minor – result should be considered as may affect medication response
-  Usual – usual prescribing considerations apply

For many medications covered in this report, international, peer reviewed prescribing guidelines are available and these are included in our report.

The two major guidelines are those of the Clinical Pharmacogenetics Implementation Consortium (CPIC) and the Royal Dutch Pharmacists Association – Pharmacogenetics Working Group (DPWG).

## Report breakdown

The report consists of the following sections:

- » Report Summary – identifies which of the patient's listed medications have pharmacogenomic information relevant to the genes tested, with an indication of the clinical importance of this information (i.e. "Major", "Minor" or "Usual" prescribing considerations).
- » Genetic Test Results Overview – genotype result for the eight gene test (i.e. six genes encoding CYP450 metabolising enzymes relevant to a large number of medications, *VKORC1* which relates to warfarin sensitivity and *SLCO1B1* which relates to statin induced myopathy).
- » Current Medications – details of the interaction between the patient's genetic results and their medication, based on the current scientific literature, as well as clinical recommendations, many sourced from peer-reviewed, published guidelines.
- » Potential Drug Interactions – identifies which of the patient's listed medications can significantly inhibit or induce CYP enzymes, as they may modify the genotype-predicted enzyme function.
- » Future Medications – lists medications that the patient is not currently taking that have potentially clinically significant prescribing considerations based on the patient's genetic test results (also classified as having "Major", "Minor" or "Usual" prescribing considerations).

As part of our clinical service, we have a team of clinical experts available to answer any questions you may have about this report or about pharmacogenomics in general.

If you have any such queries, please call our clinical team on 1-844-472-7896.

# Personalised Medication Report

## for Patient S81-252

Name: Patient S81-252  
Address: 6619-2405 Wesbrook Mall, Vancouver, BC, V6T 1Z3

DOB: 1-Mar-1965  
myDNA ID: 57230  
Pathology No: 81995N4T3V1

Collected: 27-Oct-2018  
Received: 30-Nov-2018  
Reported: 6-Dec-2018

Doctor: Dr Corey Nislow  
Copy to:

Clinical  
Notes:

Genetic interpretation by:

**myDNA**

Associate Professor Les Sheffield, MB.BS.  
FRACP Approved Pathology Practitioner  
23077

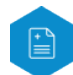

## REPORT SUMMARY

### CURRENT MEDICATIONS OVERVIEW

| MEDICATION            | GENE(S)          | PRESCRIBING CONSIDERATIONS BASED ON myDNA TEST                        |
|-----------------------|------------------|-----------------------------------------------------------------------|
| ● <b>Pantoprazole</b> | CYP2C19          | Minor – result should be considered as may affect medication response |
| ● <b>Fluoxetine</b>   | CYP2C9<br>CYP2D6 | Usual prescribing considerations apply                                |

### MEDICATIONS THAT DO NOT HAVE PRESCRIBING CONSIDERATIONS BASED ON myDNA TEST

oestrogen (Premarin Tablets), lamotrigine, trazadone

**LEGEND:** ● Major prescribing considerations ● Minor prescribing considerations ● Usual prescribing considerations

Detailed pharmacogenomic interpretation and recommendations are provided in the current medications section below.

### GENETIC TEST RESULTS OVERVIEW

| GENE    | GENOTYPE | PHENOTYPE                  | GENE    | GENOTYPE | PHENOTYPE                   |
|---------|----------|----------------------------|---------|----------|-----------------------------|
| CYP2D6  | *1/*2    | Normal metaboliser         | CYP3A4  | *1/*1    | Normal metaboliser          |
| CYP2C19 | *1/*17   | Rapid metaboliser          | CYP3A5  | *3/*3    | Poor metaboliser            |
| CYP2C9  | *1/*1    | Normal metaboliser         | SLCO1B1 | TT       | Normal Transporter Function |
| VKORC1  | GG       | Normal VKORC1 enzyme level | OPRM1   | AA       | Higher opioid sensitivity   |
| CYP1A2  | *1A/*1F  | Normal metaboliser         |         |          |                             |

Detailed interpretations of genetic test results are provided in the pharmacogenomic interpretation section below.

The following diagram provides the range of enzyme activity predicted by the myDNA test.

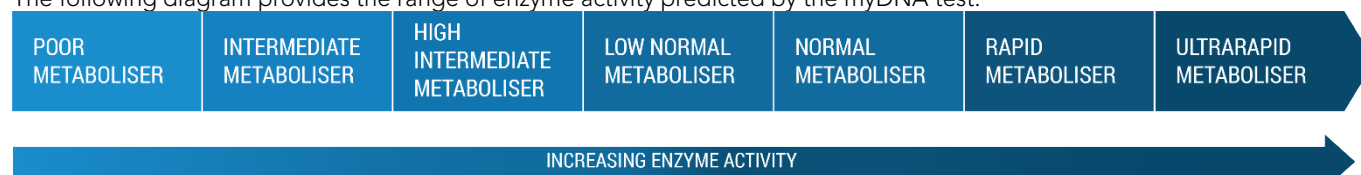

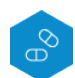

## CURRENT MEDICATIONS

### PERSONALISED INTERPRETATION AND RECOMMENDATIONS

| MEDICATION     | INTERPRETATION                                                                                                                                                                                                                                                                                                                                                                                                                                                                                                                                                                                                                                                                                                                                                                                                                                                                                                                                                                                   | RECOMMENDATION                                                                                                                                                                                            |
|----------------|--------------------------------------------------------------------------------------------------------------------------------------------------------------------------------------------------------------------------------------------------------------------------------------------------------------------------------------------------------------------------------------------------------------------------------------------------------------------------------------------------------------------------------------------------------------------------------------------------------------------------------------------------------------------------------------------------------------------------------------------------------------------------------------------------------------------------------------------------------------------------------------------------------------------------------------------------------------------------------------------------|-----------------------------------------------------------------------------------------------------------------------------------------------------------------------------------------------------------|
| ● Pantoprazole | <b>CYP2C19 - Rapid metaboliser:</b><br>This genotype predicts slightly increased metabolism of pantoprazole which has been linked to an incomplete clinical response in conditions such as oesophagitis and H. pylori.                                                                                                                                                                                                                                                                                                                                                                                                                                                                                                                                                                                                                                                                                                                                                                           | If response is inadequate, consider 1) a preference for esomeprazole or rabeprazole, 2) increasing the dose, and 3) using divided dosing (i.e. at least twice daily) even of the same overall daily dose. |
| ● Fluoxetine   | <b>CYP2D6 - Normal metaboliser</b><br><b>CYP2C9 - Normal metaboliser:</b><br>The metabolism of fluoxetine is complex due to the involvement of several CYP enzymes (especially CYP2D6 and CYP2C9), the formation of active metabolites and the inhibition of CYP2D6 by fluoxetine and its metabolites.<br><br>The CYP2D6 genotype predicts normal fluoxetine exposure and normal formation of the active S-norfluoxetine metabolite. The CYP2C9 genotype predicts normal metabolism via this pathway. However, fluoxetine and its metabolites can strongly inhibit CYP2D6 function, converting the phenotype to an intermediate or poor metaboliser which can last for up to 9 weeks after cessation of fluoxetine (this is particularly relevant if commencing a drug extensively metabolised by CYP2D6 during this time). This CYP2D6 inhibition is dose and duration of therapy dependent and could potentially lead to late onset adverse effects on a previously tolerated fluoxetine dose. | Standard dosing and prescribing measures apply.<br><br>If adverse effects are a concern, consider an alternative antidepressant for which normal metabolism is predicted.                                 |

### POTENTIAL DRUG INTERACTIONS

The effect of drug-drug interactions can be additive to the effect of genotype on drug metabolism. Inhibitors can decrease and inducers can increase metabolism, leading to changes in drug concentration and clinical effects.

Comments in the current and future medications sections only consider the effects of the patient's genotype, not those due to interacting drugs. For the health professional's consideration, the table below identifies which of the patient's current drugs may inhibit or induce those enzymes tested by myDNA. The extent of the inhibition or induction depends on the dose and duration of the therapy. The overall effect on metabolism by a specific enzyme may be estimated by considering both the genetic finding and the potential interacting drug.

| MEDICATION | INHIBITOR – MODERATE | INHIBITOR - STRONG | INDUCER |
|------------|----------------------|--------------------|---------|
| Fluoxetine | CYP2C19              | CYP2D6             |         |

## FUTURE MEDICATIONS

The following tables outline personalised recommendations for future medications.

*NOTE: These tables do not account for the effect of any inhibitors or inducers. The table is not an all-inclusive list of medications but includes many commonly prescribed medications.*

| MEDICATIONS WITH <u>MAJOR</u> PRESCRIBING CONSIDERATIONS |               |                   |                               |                      |
|----------------------------------------------------------|---------------|-------------------|-------------------------------|----------------------|
| DRUG CATEGORY                                            | MEDICATION    | GENE(S) INVOLVED  | POTENTIAL CLINICAL ISSUES     | PUBLISHED GUIDELINES |
| Antidepressants - SSRIs                                  | Citalopram    | CYP2C19           | Reduced / inadequate response | CPIC <sup>1</sup>    |
|                                                          | Escitalopram  | CYP2C19           | Reduced / inadequate response | CPIC <sup>1</sup>    |
| Antidepressants - tricyclic antidepressants              | Amitriptyline | CYP2D6<br>CYP2C19 | Reduced / inadequate response | CPIC <sup>2</sup>    |
|                                                          | Clomipramine  | CYP2D6<br>CYP2C19 | Reduced / inadequate response | CPIC <sup>2</sup>    |
|                                                          | Doxepin       | CYP2D6<br>CYP2C19 | Reduced / inadequate response | CPIC <sup>2</sup>    |
|                                                          | Imipramine    | CYP2D6<br>CYP2C19 | Reduced / inadequate response | CPIC <sup>2</sup>    |
| Antifungals - Azoles                                     | Voriconazole  | CYP2C19           | Reduced / inadequate response | CPIC <sup>3</sup>    |

| MEDICATIONS WITH <u>MINOR</u> PRESCRIBING CONSIDERATIONS |                  |                   |                                                                          |                      |
|----------------------------------------------------------|------------------|-------------------|--------------------------------------------------------------------------|----------------------|
| DRUG CATEGORY                                            | MEDICATION       | GENE(S) INVOLVED  | POTENTIAL CLINICAL ISSUES                                                | PUBLISHED GUIDELINES |
| Antidepressants - other                                  | Moclobemide      | CYP2C19           | Reduced / inadequate response                                            | -                    |
| Antidepressants - SSRIs                                  | Sertraline       | CYP2C19           | Reduced / inadequate response                                            | CPIC <sup>1</sup>    |
| Antidiabetics                                            | Gliclazide       | CYP2C9<br>CYP2C19 | Reduced / inadequate response                                            | -                    |
| Antiplatelet drugs                                       | Clopidogrel      | CYP2C19           | Adverse effects                                                          | CPIC <sup>4</sup>    |
| Benzodiazepines                                          | Clobazam         | CYP2C19           | Reduced / inadequate response                                            | -                    |
|                                                          | Diazepam         | CYP2C19           | Reduced / inadequate response                                            | -                    |
| Miscellaneous                                            | Cyclophosphamide | CYP2C19           | Increased therapeutic and/or adverse effects                             | -                    |
|                                                          | Naltrexone       | OPRM1             | Associated with reduced response to naltrexone                           | -                    |
|                                                          | Proguanil        | CYP2C19           | Altered response                                                         | -                    |
| Opioid Analgesics                                        | Morphine         | OPRM1             | Associated with increased therapeutic and/or adverse effects to morphine | -                    |
| Proton pump inhibitors                                   | Dexlansoprazole  | CYP2C19           | Reduced / inadequate response                                            | -                    |
|                                                          | Esomeprazole     | CYP2C19           | Reduced / inadequate response                                            | -                    |
|                                                          | Lansoprazole     | CYP2C19           | Reduced / inadequate response                                            | -                    |
|                                                          | Omeprazole       | CYP2C19           | Reduced / inadequate response                                            | -                    |
|                                                          | Pantoprazole     | CYP2C19           | Reduced / inadequate response                                            | -                    |
|                                                          | Rabeprazole      | CYP2C19           | Reduced / inadequate response                                            | -                    |

| MEDICATIONS WITH <u>USUAL</u> PRESCRIBING CONSIDERATIONS |             |                  |                                         |                      |
|----------------------------------------------------------|-------------|------------------|-----------------------------------------|----------------------|
| DRUG CATEGORY                                            | MEDICATION  | GENE(S) INVOLVED | POTENTIAL CLINICAL ISSUES               | PUBLISHED GUIDELINES |
| ADHD - miscellaneous agents                              | Atomoxetine | CYP2D6           | No altered effect predicted by genotype | -                    |

| MEDICATIONS WITH <u>USUAL</u> PRESCRIBING CONSIDERATIONS      |                     |                  |                                         |                      |
|---------------------------------------------------------------|---------------------|------------------|-----------------------------------------|----------------------|
| DRUG CATEGORY                                                 | MEDICATION          | GENE(S) INVOLVED | POTENTIAL CLINICAL ISSUES               | PUBLISHED GUIDELINES |
| Angiotensin receptor blockers                                 | Irbesartan          | CYP2C9           | No altered effect predicted by genotype | -                    |
|                                                               | Losartan            | CYP2C9           | No altered effect predicted by genotype | -                    |
| Antiarrhythmics                                               | Flecainide          | CYP2D6           | No altered effect predicted by genotype | -                    |
|                                                               | Propafenone         | CYP2D6           | No altered effect predicted by genotype | -                    |
| Anticholinergics (genitourinary)                              | Darifenacin         | CYP2D6           | No altered effect predicted by genotype | -                    |
|                                                               | Fesoterodine        | CYP2D6           | No altered effect predicted by genotype | -                    |
|                                                               | Tolterodine         | CYP2D6           | No altered effect predicted by genotype | -                    |
| Anticholinesterases                                           | Donepezil           | CYP2D6           | No altered effect predicted by genotype | -                    |
|                                                               | Galantamine         | CYP2D6           | No altered effect predicted by genotype | -                    |
| Anticoagulants                                                | Acenocoumarol       | VKORC1<br>CYP2C9 | Normal acenocoumarol sensitivity        |                      |
|                                                               | Warfarin            | VKORC1<br>CYP2C9 | Normal warfarin sensitivity             | FDA <sup>5</sup>     |
| Antidepressants - other                                       | Mirtazapine         | CYP2D6<br>CYP1A2 | No altered effect predicted by genotype | -                    |
|                                                               | Vortioxetine        | CYP2D6           | No altered effect predicted by genotype | -                    |
| Antidepressants - serotonin noradrenaline reuptake inhibitors | Duloxetine          | CYP2D6<br>CYP1A2 | No altered effect predicted by genotype | -                    |
|                                                               | Venlafaxine         | CYP2D6           | No altered effect predicted by genotype | DPWG <sup>6</sup>    |
| Antidepressants - SSRIs                                       | Fluoxetine          | CYP2D6<br>CYP2C9 | No altered effect predicted by genotype | -                    |
|                                                               | Fluvoxamine         | CYP2D6<br>CYP1A2 | No altered effect predicted by genotype | CPIC <sup>1</sup>    |
|                                                               | Paroxetine          | CYP2D6           | No altered effect predicted by genotype | CPIC <sup>1</sup>    |
| Antidepressants - tricyclic antidepressants                   | Desipramine         | CYP2D6           | No altered effect predicted by genotype | CPIC <sup>2</sup>    |
|                                                               | Nortriptyline       | CYP2D6           | No altered effect predicted by genotype | CPIC <sup>2</sup>    |
| Antidiabetics                                                 | Glimepiride         | CYP2C9           | No altered effect predicted by genotype | -                    |
|                                                               | Glyburide           | CYP2C9           | No altered effect predicted by genotype | -                    |
| Antiemetics                                                   | Metoclopramide      | CYP2D6           | No altered effect predicted by genotype | -                    |
|                                                               | Ondansetron         | CYP2D6           | No altered effect predicted by genotype | CPIC <sup>7</sup>    |
| Antiepileptics                                                | Phenytoin           | CYP2C9           | No altered effect predicted by genotype | CPIC <sup>8</sup>    |
| Antihistamines                                                | Chlorpheniramine    | CYP2D6           | No altered effect predicted by genotype | -                    |
|                                                               | Dexchlorpheniramine | CYP2D6           | No altered effect predicted by genotype | -                    |

| MEDICATIONS WITH <u>USUAL</u> PRESCRIBING CONSIDERATIONS |                  |                  |                                         |                      |
|----------------------------------------------------------|------------------|------------------|-----------------------------------------|----------------------|
| DRUG CATEGORY                                            | MEDICATION       | GENE(S) INVOLVED | POTENTIAL CLINICAL ISSUES               | PUBLISHED GUIDELINES |
| Antipsychotics                                           | Promethazine     | CYP2D6           | No altered effect predicted by genotype | -                    |
|                                                          | Aripiprazole     | CYP2D6           | No altered effect predicted by genotype | -                    |
|                                                          | Brexpiprazole    | CYP2D6           | No altered effect predicted by genotype | -                    |
|                                                          | Chlorpromazine   | CYP2D6           | No altered effect predicted by genotype | -                    |
|                                                          | Clozapine        | CYP1A2           | No altered effect predicted by genotype | -                    |
|                                                          | Haloperidol      | CYP2D6           | No altered effect predicted by genotype | -                    |
|                                                          | Olanzapine       | CYP1A2           | No altered effect predicted by genotype | -                    |
|                                                          | Pimozide         | CYP2D6           | No altered effect predicted by genotype | -                    |
|                                                          | Quetiapine       | CYP3A4           | No altered effect predicted by genotype | -                    |
|                                                          | Risperidone      | CYP2D6           | No altered effect predicted by genotype | -                    |
|                                                          | Zuclopenthixol   | CYP2D6           | No altered effect predicted by genotype | -                    |
| Antitussives                                             | Dextromethorphan | CYP2D6           | No altered effect predicted by genotype | -                    |
| Beta blockers                                            | Carvedilol       | CYP2D6           | No altered effect predicted by genotype | -                    |
|                                                          | Metoprolol       | CYP2D6           | No altered effect predicted by genotype | -                    |
|                                                          | Nebivolol        | CYP2D6           | No altered effect predicted by genotype | -                    |
|                                                          | Propranolol      | CYP2D6<br>CYP1A2 | No altered effect predicted by genotype | -                    |
| Calcineurin inhibitors                                   | Tacrolimus       | CYP3A5           | No altered effect predicted by genotype | CPIC <sup>9</sup>    |
| Glaucoma - ocular preparations                           | Timolol          | CYP2D6           | No altered effect predicted by genotype | -                    |
| Hypnotics                                                | Melatonin        | CYP1A2           | No altered effect predicted by genotype | -                    |
| Immunomodulators and antineoplastics                     | Tamoxifen        | CYP2D6           | No altered effect predicted by genotype | CPIC <sup>10</sup>   |
| Miscellaneous                                            | Atazanavir       | CYP3A5           | No altered effect predicted by genotype | -                    |
|                                                          | Eliglustat       | CYP2D6           | No altered effect predicted by genotype | TGA <sup>11</sup>    |
| Neurological drugs                                       | Tetrabenazine    | CYP2D6           | No altered effect predicted by genotype | FDA <sup>12</sup>    |
| NSAIDs                                                   | Celecoxib        | CYP2C9           | No altered effect predicted by genotype | -                    |
|                                                          | Diclofenac       | CYP2C9           | No altered effect predicted by genotype | -                    |
|                                                          | Flurbiprofen     | CYP2C9           | No altered effect predicted by genotype | -                    |
|                                                          | Ibuprofen        | CYP2C9           | No altered effect predicted by genotype | -                    |

## MEDICATIONS WITH USUAL PRESCRIBING CONSIDERATIONS

| DRUG CATEGORY     | MEDICATION        | GENE(S) INVOLVED  | POTENTIAL CLINICAL ISSUES                        | PUBLISHED GUIDELINES |
|-------------------|-------------------|-------------------|--------------------------------------------------|----------------------|
|                   | Indomethacin      | CYP2C9            | No altered effect predicted by genotype          | -                    |
|                   | Mefenamic Acid    | CYP2C9            | No altered effect predicted by genotype          | -                    |
|                   | Meloxicam         | CYP2C9            | No altered effect predicted by genotype          | -                    |
|                   | Piroxicam         | CYP2C9            | No altered effect predicted by genotype          | -                    |
| Opioid Analgesics | Codeine           | CYP2D6<br>OPRM1   | Associated with increased sensitivity to codeine | CPIC <sup>13</sup>   |
|                   | Hydrocodone       | CYP2D6            | No altered effect predicted by genotype          |                      |
|                   | Oxycodone         | CYP2D6            | No altered effect predicted by genotype          | -                    |
|                   | Tramadol          | CYP2D6            | No altered effect predicted by genotype          | -                    |
| Psychostimulants  | Dextroamphetamine | CYP2D6            | No altered effect predicted by genotype          | -                    |
|                   | Lisdexamfetamine  | CYP2D6            | No altered effect predicted by genotype          | -                    |
| Statins           | Atorvastatin      | SLCO1B1<br>CYP3A4 | No altered effect predicted by genotype          | -                    |
|                   | Fluvastatin       | SLCO1B1<br>CYP2C9 | No altered effect predicted by genotype          | -                    |
|                   | Pravastatin       | SLCO1B1           | No altered effect predicted by genotype          | -                    |
|                   | Rosuvastatin      | SLCO1B1           | No altered effect predicted by genotype          | -                    |
|                   | Simvastatin       | SLCO1B1<br>CYP3A4 | No altered effect predicted by genotype          | CPIC <sup>14</sup>   |

### LEGEND:

CPIC = Clinical Pharmacogenetics Implementation Consortium  
DPWG = The Royal Dutch Pharmacists Association – Pharmacogenetics Working Group

TGA = Therapeutic Goods Administration (Australia)  
FDA = Food and Drug Administration (US)

CPIC and DPWG guidelines are available on the PharmGKB website [www.pharmgkb.org/view/dosing-guidelines.do](http://www.pharmgkb.org/view/dosing-guidelines.do)

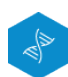

## PHARMACOGENOMIC INTERPRETATION

### EXPLANATION OF GENETIC RESULTS

| GENE   | GENOTYPE | PREDICTED FUNCTION                                                                                                                                                                                                                                                                                         |
|--------|----------|------------------------------------------------------------------------------------------------------------------------------------------------------------------------------------------------------------------------------------------------------------------------------------------------------------|
| CYP2D6 | *1/*2    | <p><b>CYP2D6 - Normal metaboliser</b></p> <p>Due to the presence of two normal function alleles, this individual is predicted to have a normal metaboliser phenotype. For a drug extensively metabolised by CYP2D6, drug exposure and clinical effects may be expected to lie within the normal range.</p> |



## EXPLANATION OF GENETIC RESULTS

| GENE    | GENOTYPE | PREDICTED FUNCTION                                                                                                                                                                                                                                                                                                                                                                                                                                                                                                                                                                                                                                                                                                                                                                                                                                                        |
|---------|----------|---------------------------------------------------------------------------------------------------------------------------------------------------------------------------------------------------------------------------------------------------------------------------------------------------------------------------------------------------------------------------------------------------------------------------------------------------------------------------------------------------------------------------------------------------------------------------------------------------------------------------------------------------------------------------------------------------------------------------------------------------------------------------------------------------------------------------------------------------------------------------|
| CYP2C19 | *1/*17   | <b>CYP2C19 - Rapid metaboliser</b><br>Due to the presence of one normal function allele and one increased function allele, this individual is predicted to have a rapid metaboliser phenotype. For a drug extensively metabolised by CYP2C19, drug exposure and clinical effects may either be slightly decreased (for an active drug) or slightly increased (for a prodrug). This individual is at risk of therapeutic failure (active drug) or adverse effects (prodrug).                                                                                                                                                                                                                                                                                                                                                                                               |
| CYP2C9  | *1/*1    | <b>CYP2C9 - Normal metaboliser</b><br>Due to the presence of two normal function alleles, this individual is predicted to have a normal metaboliser phenotype. For a drug extensively metabolised by CYP2C9, drug exposure and clinical effects may be expected to lie within the normal range.                                                                                                                                                                                                                                                                                                                                                                                                                                                                                                                                                                           |
| VKORC1  | GG       | <b>VKORC1 - Normal VKORC1 enzyme level</b><br>The VKORC1 enzyme is predicted to be present in normal amounts and the response to warfarin will be normal. The CYP2C9 genotype should also be considered together with the VKORC1 genotype for calculating the initial warfarin dose.                                                                                                                                                                                                                                                                                                                                                                                                                                                                                                                                                                                      |
| CYP1A2  | *1A/*1F  | <b>CYP1A2 - Normal metaboliser</b><br>Due to the presence of only one copy of the *1F allele, this individual is predicted to have a normal metaboliser phenotype. Normal metabolism of CYP1A2 substrate drugs is predicted. Furthermore, metabolism is not expected to be increased by exposure to inducers such as tobacco smoking and certain dietary components and drugs.                                                                                                                                                                                                                                                                                                                                                                                                                                                                                            |
| CYP3A4  | *1/*1    | <b>CYP3A4 - Normal metaboliser</b><br>The *22 allele is not present and this individual is expected to have a normal metaboliser phenotype. Whilst many drugs are known to be metabolised by CYP3A4, relatively few genetic variations have been found that affect metabolism of a limited number of these drugs.                                                                                                                                                                                                                                                                                                                                                                                                                                                                                                                                                         |
| CYP3A5  | *3/*3    | <b>CYP3A5 - Poor metaboliser</b><br>Due to the presence of two no function alleles, this individual is predicted to have a poor metaboliser phenotype (CYP3A5 non-expressor). CYP3A5 is known to metabolise certain drugs, including tacrolimus. Note that this individual's genotype is the most common one amongst Caucasians.                                                                                                                                                                                                                                                                                                                                                                                                                                                                                                                                          |
| SLCO1B1 | TT       | <b>SLCO1B1 - Normal Transporter Function</b><br>The decreased function *5 allele is not present and this individual is predicted to have normal function of the SLCO1B1 encoded transporter. The transporter is important for the clearance of certain drugs, including simvastatin.                                                                                                                                                                                                                                                                                                                                                                                                                                                                                                                                                                                      |
| OPRM1   | AA       | <b>OPRM1 - Higher opioid sensitivity</b><br>The AA genotype contains two normal alleles for the OPRM1 gene which encodes the mu opioid receptor. Whilst the evidence around OPRM1 genetic variation continues to develop, it appears that this result is associated with increased sensitivity to certain opioids (in particular, morphine) compared to those with the variant allele (G). These findings are supported by a number of cohort studies and at least two meta-analyses <sup>15, 16</sup> however, this is not shown in all studies. For naltrexone in the management of alcohol use disorder, some studies have shown an association of this result with a reduced response compared to those with the variant allele. Note the frequency of the variant allele (G) is higher in people of Asian ancestry (around 40%) than European ancestry (around 15%). |

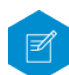

## REFERENCES

- Hicks J, Bishop J, Sangkuhl K, Müller D, Ji Y, Leckband S et al. Clinical Pharmacogenetics Implementation Consortium (CPIC) Guideline for CYP2D6 and CYP2C19 Genotypes and Dosing of Selective Serotonin Reuptake Inhibitors. Clinical Pharmacology & Therapeutics. 2015;98(2):127-134.

2. Hicks JK, Sangkuhl K, Swen JJ, Ellingrod VL, Muller DJ, Shimoda K, et al. Clinical pharmacogenetics implementation consortium guideline (CPIC) for CYP2D6 and CYP2C19 genotypes and dosing of tricyclic antidepressants: 2016 update. *Clin Pharmacol Ther.* 2016.
3. Moriyama B, Obeng A, Barbarino J, Penzak S, Henning S, Scott S et al. Clinical Pharmacogenetics Implementation Consortium (CPIC®) Guideline for CYP2C19 and Voriconazole Therapy. *Clinical Pharmacology & Therapeutics.* 2016;.
4. Scott S, Sangkuhl K, Stein C, Hulot J, Mega J, Roden D et al. Clinical Pharmacogenetics Implementation Consortium Guidelines for CYP2C19 Genotype and Clopidogrel Therapy: 2013 Update. *Clin Pharmacol Ther.* 2013;94(3):317-323.
5. DailyMed - COUMADIN- warfarin sodium tablet . 2016. DailyMed - COUMADIN- warfarin sodium tablet . [ONLINE] Available at: [https://dailymed.nlm.nih.gov/dailymed/drugInfo.cfm?setid=d91934a0-902e-c26c-23ca-d5accc4151b6#\\_Refs12.5](https://dailymed.nlm.nih.gov/dailymed/drugInfo.cfm?setid=d91934a0-902e-c26c-23ca-d5accc4151b6#_Refs12.5). [Accessed 11 October 2016].
6. Swen J, Nijenhuis M, de Boer A, Grandia L, Maitland-van der Zee A, Mulder H et al. Pharmacogenetics: From Bench to Byte— An Update of Guidelines. *Clin Pharmacol Ther.* 2011;89(5):662-673.
7. Bell G, Caudle K, Whirl-Carrillo M, Gordon R, Hikino K, Prows C et al. Clinical Pharmacogenetics Implementation Consortium (CPIC) guideline for CYP2D6 genotype and use of ondansetron and tropisetron. *Clinical Pharmacology & Therapeutics.* 2017 (epub ahead of print).
8. Caudle KE, Rettie AE, Whirl-Carrillo M, Smith LH, Mintzer S, Lee MTM et al. Clinical Pharmacogenetics Implementation Consortium Guidelines for CYP2C9 and HLA-B Genotypes and Phenytoin Dosing. *Clin Pharmacol Ther.* 2014;95(5):542-548
9. Birdwell K, Decker B, Barbarino J, Peterson J, Stein C, Sadee W et al. Clinical Pharmacogenetics Implementation Consortium (CPIC) Guidelines for CYP3A5 Genotype and Tacrolimus Dosing. *Clin Pharmacol Ther.* 2015;98(1):19-24.
10. Goetz MP, Sangkuhl K, Guchelaar HJ, Schwab M, Province M, Whirl-Carrillo M, et al. Clinical Pharmacogenetics Implementation Consortium (CPIC) Guideline for CYP2D6 and Tamoxifen Therapy. *Clin Pharmacol Ther.* 2018.
11. TGA eBS - Product and Consumer Medicine Information Licence. 2016. TGA eBS - Product and Consumer Medicine Information Licence. [ONLINE] Available at: <https://www.ebs.tga.gov.au/ebs/picmi/picmirepository.nsf/pdf?OpenAgent&id=CP-2015-PI-01366-1>. [Accessed 11 October 2016].
12. DailyMed - TETRABENAZINE- tetrabenazine tablet. 2017. [ONLINE] Available at: <https://dailymed.nlm.nih.gov/dailymed/drugInfo.cfm?setid=a9c0e69d-adb2-4fca-9410-c9ae9ccf93ee#section-8.7> [Accessed 25 November 2017]
13. Crews, K R et al. Clinical Pharmacogenetics Implementation Consortium Guidelines For Cytochrome P450 2D6 Genotype And Codeine Therapy: 2014 Update. *Clin Pharmacol Ther* 95.4 (2014): 376-382.
14. Ramsey LB, Johnson SG, Caudle KE, Haidar CE, Voora D, Wilke RA, et al. The Clinical Pharmacogenetics Implementation Consortium Guidelines for SLCO1B1 and Simvastatin-Induced Myopathy: 2014 Update. *Clin Pharmacol Ther.* Online publication 9 July 2014. doi:10.1038/clpt.2014.125
15. Zhen-Yu Ren, Xiao-Qing Xu, Yan-Ping Bao, Jia He, Le Shi et al. The Impact of Genetic Variation on Sensitivity to Opioid Analgesics in Patients with Postoperative Pain: A Systematic Review and Meta-Analysis. *Pain Physician* 2015; 18:131-152.
16. In Cheol Hwang, Ji-Young Park, Seung-Kwon Myung, Hong Yup Ahn, Ken-ichi Fukuda, Qin Liao. OPRM1 A118G Gene Variant and Postoperative Opioid Requirement A Systematic Review and Meta-analysis. *Anesthesiology* 2014; 121:825-34.

#### REPORT PREPARED BY:

**Associate Professor Les Sheffield**  
Approved Pathology Practitioner  
MB.BS. FRACP

**Sam Mostafa**  
Consultant Pharmacist  
BPharm, MPS, AACPA

Prepared by: My DNA Life Australia Pty Ltd. - A/Prof Les Sheffield, Accredited Pathology Practitioner  
Laboratory Results provided by: myDNA

**Disclaimer:** The pharmacogenomic test result in this report is just one factor that the prescribing doctor will take into consideration when determining a patient's appropriate medication and dose. These interpretations are being provided to the prescribing doctor as a tool to assist in the prescription of medication. Patients are advised not to alter the dose or stop any medications unless instructed by the doctor. The interpretation and clinical recommendations are based on the above results as reported by myDNA and its affiliates and also uses information provided to myDNA by the referring doctor. This report also assumes correct labelling of sample tubes and that the sample is from the above patient.

## MYDNA CLINICAL SUPPORT

For all health practitioner enquiries please contact myDNA clinical support

T: 1-844-472-7896

E: [clinical@mydna.life](mailto:clinical@mydna.life)
