# Supplementary material for: Pharmacogenomics at the Point of Care: A Community Pharmacy Project in British Columbia
Source: MDPI journal article supplement (doi:10.3390/jpm11010011), 2020-12-24
Supplement: s1 [file s1]

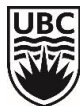

**PARTICIPANT EXPERIENCE SURVEY**  
**Pharmacogenomic Services in Community Pharmacy**  
**(H16-02362)**

Please indicate how much you agree or disagree with the following statements:

|                                                                                                                      | Strongly Disagree | Disagree | Agree | Strongly Agree |
|----------------------------------------------------------------------------------------------------------------------|-------------------|----------|-------|----------------|
| 1. My pharmacist gave me enough information about the study.                                                         |                   |          |       |                |
| 2. I understood the purpose of the study and the terms used by my pharmacist were not overly technical.              |                   |          |       |                |
| 3. I was given enough time to ask questions and discuss the study with my pharmacist.                                |                   |          |       |                |
| 4. I feel comfortable participating in this study.                                                                   |                   |          |       |                |
| 5. I think the community pharmacy is a good location for genetic testing.                                            |                   |          |       |                |
| 6. I am comfortable with the idea of pharmacists using genetic information to help them make drug therapy decisions. |                   |          |       |                |
| 7. I would be willing to participate in this type of research again.                                                 |                   |          |       |                |

**Additional Comments:**
