# Supplementary material for: Pharmacogenomics at the Point of Care: A Community Pharmacy Project in British Columbia
Source: MDPI journal article supplement (doi:10.3390/jpm11010011), 2020-12-24
Supplement: s1 [file s1]

| Pharmacy                     | City           |
|------------------------------|----------------|
| Armstrong Pharmacy           | Armstrong      |
| BC Pharmacy Association      | Kamloops       |
| Harbourside Pharmachoice     | Port McNeill   |
| Hart Drug Mart               | Prince George  |
| Heart Pharmacy Ida           | Victoria       |
| Lakeside Medicine Centre     | Kelowna        |
| London Drugs #67             | Courtenay      |
| Naz's Pharmacy No. 2 Ltd.    | Surrey         |
| Pharmasave #032              | Houston        |
| Phoenix Dispensary           | Prince George  |
| Pratt's Compounding Pharmacy | Kamloops       |
| Quadra Village Drug Mart     | Victoria       |
| Safeway #4918 (Willowbrook)  | Langley        |
| Save-on-foods Pharmacy #987  | Williams Lake  |
| Shoppers Drug Mart #2212     | Surrey         |
| Wellness Pharmacy #1         | Vancouver      |
| Wilson Pharmacy              | Port Coquitlam |
