# Supplementary material for: Pharmacogenomics at the Point of Care: A Community Pharmacy Project in British Columbia
Source: MDPI journal article supplement (doi:10.3390/jpm11010011), 2020-12-24
Supplement: s1 [file s1]

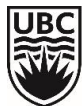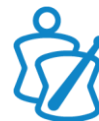

**PHARMACIST EXPERIENCE SURVEY**  
**Pharmacogenomic Services in Community Pharmacy**  
**(H16-02362)**

Please indicate how much you agree or disagree with the following statements:

|                                                                                 | Strongly Disagree | Disagree | Agree | Strongly Agree |
|---------------------------------------------------------------------------------|-------------------|----------|-------|----------------|
| 1. The training for participation in this study was adequate and appropriate.   |                   |          |       |                |
| 2. The support from the study team met my needs.                                |                   |          |       |                |
| 3. The study team responded to my queries in a timely manner.                   |                   |          |       |                |
| 4. The materials I received for the study were thorough.                        |                   |          |       |                |
| 5. I feel my patients appreciated the opportunity to participate in this study. |                   |          |       |                |
| 6. Overall, I had a positive experience participating in this study.            |                   |          |       |                |

**Additional Comments:**
