# Supplementary material for: Pharmacogenomics at the Point of Care: A Community Pharmacy Project in British Columbia
Source: MDPI journal article supplement (doi:10.3390/jpm11010011), 2020-12-24
Supplement: s1 [file s1]

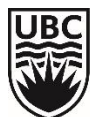

**PARTICIPANT RECRUITMENT CHECKLIST**  
**Pharmacogenomic Services in Community Pharmacy**  
**(H16-02362)**

|                                                                                                                                                                                                                       |                                                                                                                                                                                                                                                                                                                                        |  |
|-----------------------------------------------------------------------------------------------------------------------------------------------------------------------------------------------------------------------|----------------------------------------------------------------------------------------------------------------------------------------------------------------------------------------------------------------------------------------------------------------------------------------------------------------------------------------|--|
| Date                                                                                                                                                                                                                  |                                                                                                                                                                                                                                                                                                                                        |  |
| <b>Ensure you complete and document the following steps</b> when recruiting a participant for the study so they may provide consent. <b>Write down any relevant notes/discussion that come up during the process.</b> |                                                                                                                                                                                                                                                                                                                                        |  |
| <input type="checkbox"/>                                                                                                                                                                                              | Move participant into private area – verify they have about 20-25 mins.                                                                                                                                                                                                                                                                |  |
| <input type="checkbox"/>                                                                                                                                                                                              | UBC Pharmaceutical Sciences leading the research, funded by Genome BC, Pfizer and Green Shield.                                                                                                                                                                                                                                        |  |
| <input type="checkbox"/>                                                                                                                                                                                              | Participation is voluntary, won't have any effect on healthcare they receive from pharmacy or other healthcare providers whether they participate or not.                                                                                                                                                                              |  |
| <input type="checkbox"/>                                                                                                                                                                                              | Project is looking to recruit participants who: <ul style="list-style-type: none"> <li>• are currently taking or have previously taken one of the qualifying drugs</li> <li>• understand English or have a competent translator</li> <li>• are 19 years or older</li> <li>• are able to provide consent &amp; info required</li> </ul> |  |
| <input type="checkbox"/>                                                                                                                                                                                              | You and the research team have been trained on consent procedures, handling saliva samples and maintaining privacy & confidentiality in compliance with applicable laws.                                                                                                                                                               |  |
| <input type="checkbox"/>                                                                                                                                                                                              | Identify the purposes of the research project: <ol style="list-style-type: none"> <li>1. Assess public and patient receptivity to receiving pharmacogenomic sequencing and advice in community pharmacies.</li> </ol>                                                                                                                  |  |
| <input type="checkbox"/>                                                                                                                                                                                              | 2. Outcome analysis of the test results.                                                                                                                                                                                                                                                                                               |  |
| <input type="checkbox"/>                                                                                                                                                                                              | 3. Validate storage and communication of actionable data                                                                                                                                                                                                                                                                               |  |
| <input type="checkbox"/>                                                                                                                                                                                              | 4. Capture patient experiences.                                                                                                                                                                                                                                                                                                        |  |
|                                                                                                                                                                                                                       | 5. Creating digital database of DNA sequence info for future research.                                                                                                                                                                                                                                                                 |  |
|                                                                                                                                                                                                                       | 6. Inform the health care case and financial case for PGx implementation.                                                                                                                                                                                                                                                              |  |
| <input type="checkbox"/>                                                                                                                                                                                              | Participation advances genomic research. Participant will receive test results and medication may be altered.                                                                                                                                                                                                                          |  |
| <input type="checkbox"/>                                                                                                                                                                                              | Clearly explain what you require of the participant and re-iterate what the study requires: <ul style="list-style-type: none"> <li>• Consent</li> </ul>                                                                                                                                                                                |  |
| <input type="checkbox"/>                                                                                                                                                                                              | • Saliva sample                                                                                                                                                                                                                                                                                                                        |  |
| <input type="checkbox"/>                                                                                                                                                                                              | • Personal info (may contact if something missing or for future research)                                                                                                                                                                                                                                                              |  |
| <input type="checkbox"/>                                                                                                                                                                                              | • Medication/medical history – will be linked to DNA info for research purposes                                                                                                                                                                                                                                                        |  |
| <input type="checkbox"/>                                                                                                                                                                                              | Explain/reassure the participant about what will happen to their personal info: <ul style="list-style-type: none"> <li>• Protected by privacy laws at all times.</li> </ul>                                                                                                                                                            |  |
| <input type="checkbox"/>                                                                                                                                                                                              | • Only project manager, principle investigator or his designate will have access to identifying info.                                                                                                                                                                                                                                  |  |
| <input type="checkbox"/>                                                                                                                                                                                              | • Once participant info & saliva sample received at UBC, will only be identified by participant code.                                                                                                                                                                                                                                  |  |



|                          |                                                                                                                                                                                                                                                                                                                                                                                                                                 |  |
|--------------------------|---------------------------------------------------------------------------------------------------------------------------------------------------------------------------------------------------------------------------------------------------------------------------------------------------------------------------------------------------------------------------------------------------------------------------------|--|
| <input type="checkbox"/> | <ul style="list-style-type: none"> <li>Key file will be only link between participant codes &amp; identifying info. The key file, will be transferred to a separate drive which will be kept in a secure location within UBC with limited access.</li> </ul>                                                                                                                                                                    |  |
| <input type="checkbox"/> | <ul style="list-style-type: none"> <li>No personal info sold or used for commercial purposes. Identity will not be disclosed in any report.</li> </ul>                                                                                                                                                                                                                                                                          |  |
| <input type="checkbox"/> | <ul style="list-style-type: none"> <li>All identifying info and saliva samples will be destroyed by December 31, 2020. De-identified digital DNA sequences retained until no longer useful for research.</li> </ul>                                                                                                                                                                                                             |  |
| <input type="checkbox"/> | Re-iterate: A project goal is to create a digital database of DNA sequence info – means that de-identified DNA info could be used for other research (with ethics approval).                                                                                                                                                                                                                                                    |  |
| <input type="checkbox"/> | Can withdraw any time without giving reason (until key file destroyed - Dec 31, 2020).                                                                                                                                                                                                                                                                                                                                          |  |
| <input type="checkbox"/> | Can contact you or contacts listed in info package for questions or withdrawal.                                                                                                                                                                                                                                                                                                                                                 |  |
| <input type="checkbox"/> | By consenting, participant does not give up any legal rights if they become ill or injured as a result of participation. <ul style="list-style-type: none"> <li>Risk is extremely low since – only providing saliva sample &amp; some personal/medical info.</li> </ul>                                                                                                                                                         |  |
| <input type="checkbox"/> | Study will not cost anything except their time. Will receive a report for participation.                                                                                                                                                                                                                                                                                                                                        |  |
| <input type="checkbox"/> | Show video to explain some science and procedures. Stay with them to answer questions.                                                                                                                                                                                                                                                                                                                                          |  |
| <input type="checkbox"/> | Ask participant to explain what they understand and think of the info they've heard and seen. Any questions or more information required?                                                                                                                                                                                                                                                                                       |  |
| <input type="checkbox"/> | Explain what the participant needs to do next: <ol style="list-style-type: none"> <li>Take Participant Info Package and Consent Form home to review.</li> </ol>                                                                                                                                                                                                                                                                 |  |
| <input type="checkbox"/> | <ol style="list-style-type: none"> <li>Understand their obligations and how their info, saliva and DNA is going to be used.</li> </ol>                                                                                                                                                                                                                                                                                          |  |
| <input type="checkbox"/> | <ol style="list-style-type: none"> <li>If they still want to participate, a second meeting is required to:             <ol style="list-style-type: none"> <li>Sign the consent form.</li> <li>Collect the saliva sample.</li> <li>Obtain some personal and medical info.                 <ol style="list-style-type: none"> <li>Show Data Collection Form &amp; Participant Identifying Form</li> </ol> </li> </ol> </li> </ol> |  |
| <input type="checkbox"/> | Arrange follow-up meeting. <ul style="list-style-type: none"> <li>Bring in meds or list of meds.</li> <li>Must not eat, drink, smoke, or chew gum 30 mins prior to second meeting for saliva collection.</li> </ul>                                                                                                                                                                                                             |  |

|                      |  |           |  |
|----------------------|--|-----------|--|
| Pharmacy Name        |  |           |  |
| Pharmacy Address     |  |           |  |
| Pharmacist Name      |  | License # |  |
| Pharmacist Signature |  |           |  |
